# Supplementary material for: Physically based model of the contribution of red snow algal cells to temporal changes in albedo in northwest Greenland
Source: Copernicus journal article supplement (doi:10.5194/tc-14-2087-2020), 2020-06-29
Supplement: Supplementary file 1 [file tc-14-2087-2020-supplement.pdf]

Supplement of The Cryosphere, 14, 2087–2101, 2020  
<https://doi.org/10.5194/tc-14-2087-2020-supplement>  
© Author(s) 2020. This work is distributed under  
the Creative Commons Attribution 4.0 License.

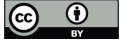

*Supplement of*

## **Physically based model of the contribution of red snow algal cells to temporal changes in albedo in northwest Greenland**

**Yukihiko Onuma et al.**

*Correspondence to:* Yukihiko Onuma (onuma@iis.u-tokyo.ac.jp)

The copyright of individual parts of the supplement might differ from the CC BY 4.0 License.

## Supplement

**Table S1: Meteorological conditions (10:00 LT) and snow layer depth from mid-June to early August at the study site for the PBSAM.**

| Day of the year | Solar zenith angle (degree) | Solar azimuth (degree) | Ratio of direct and diffuse radiation | Downward shortwave radiation ( $\text{W m}^{-2}$ ) | Snow layer depth (cm) |
|-----------------|-----------------------------|------------------------|---------------------------------------|----------------------------------------------------|-----------------------|
| 168             | 62.8                        | 105.1                  | 0.2                                   | 421.6                                              | 142.0                 |
| 176             | 62.9                        | 104.6                  | 1.0                                   | 268.9                                              | 135.0                 |
| 181             | 63.1                        | 104.4                  | 0.4                                   | 415.1                                              | 110.0                 |
| 190             | 64.0                        | 104.3                  | 0.4                                   | 400.9                                              | 80.0                  |
| 197             | 65.0                        | 104.3                  | 0.7                                   | 330.2                                              | 61.0                  |
| 203             | 66.1                        | 104.5                  | 1.0                                   | 136.8                                              | 44.0                  |
| 209             | 67.4                        | 104.8                  | 0.8                                   | 176.9                                              | 34.0                  |
| 215             | 68.8                        | 105.2                  | 1.0                                   | 84.9                                               | 19.0                  |

**Table S2: Meteorological conditions (11:00 LT) from mid-June to early August at the study site for the PBSAM.**

| Day of the year | Solar zenith angle (degree) | Solar azimuth (degree) | Ratio of direct and diffuse radiation | Downward shortwave radiation ( $\text{W m}^{-2}$ ) |
|-----------------|-----------------------------|------------------------|---------------------------------------|----------------------------------------------------|
| 168             | 59.8                        | 120.4                  | 0.2                                   | 487.1                                              |
| 176             | 59.9                        | 120.0                  | 0.9                                   | 455.2                                              |
| 181             | 60.1                        | 119.7                  | 0.4                                   | 478.8                                              |
| 190             | 61.0                        | 119.5                  | 0.4                                   | 465.8                                              |
| 197             | 62.0                        | 119.5                  | 0.6                                   | 245.3                                              |
| 203             | 63.1                        | 119.7                  | 1.0                                   | 155.7                                              |
| 209             | 64.4                        | 120.0                  | 0.9                                   | 195.8                                              |
| 215             | 65.9                        | 120.4                  | 0.8                                   | 161.6                                              |

**Table S3: Meteorological conditions (12:00 LT) from mid-June to early August at the study site for the PBSAM.**

| Day of the year | Solar zenith angle (degree) | Solar azimuth (degree) | Ratio of direct and diffuse radiation | Downward shortwave radiation ( $\text{W m}^{-2}$ ) |
|-----------------|-----------------------------|------------------------|---------------------------------------|----------------------------------------------------|
| 168             | 57.2                        | 136.3                  | 0.2                                   | 551.7                                              |
| 176             | 57.3                        | 135.8                  | 0.5                                   | 535.4                                              |
| 181             | 57.6                        | 135.6                  | 0.4                                   | 535.4                                              |
| 190             | 58.5                        | 135.3                  | 0.4                                   | 523.6                                              |
| 197             | 59.5                        | 135.3                  | 0.6                                   | 362.0                                              |
| 203             | 60.6                        | 135.4                  | 1.0                                   | 191.0                                              |
| 209             | 61.9                        | 135.6                  | 0.9                                   | 209.9                                              |
| 215             | 63.3                        | 136.0                  | 0.7                                   | 344.3                                              |

**Table S4: Snow properties of the snow surface layer (depth = 0–2 cm) at the study site, derived from snow pit observations and used in the albedo model. The mass concentrations of OC were calculated from observed algal cell concentrations by equation (3). Because mass concentration of MD was not observed on day 168, that on day 168 was assumed to be same as that on day 176.**

| Day of the year | Snow grain size (mm) | Snow water equivalent (kg m <sup>-2</sup> ) | Snow temperature (°C) | Mass concentration of mineral dust (mg L <sup>-1</sup> ) | Mass concentration of black carbon (mg L <sup>-1</sup> ) | Mass concentration of organic carbon (mg L <sup>-1</sup> ) |
|-----------------|----------------------|---------------------------------------------|-----------------------|----------------------------------------------------------|----------------------------------------------------------|------------------------------------------------------------|
| 168             | 0.3                  | 7.7                                         | -0.2                  | 2.7×10 <sup>-1</sup>                                     | 2.1×10 <sup>-3</sup>                                     | 8.3×10 <sup>-2</sup>                                       |
| 176             | 0.6                  | 9.7                                         | -0.1                  | 2.7×10 <sup>-1</sup>                                     | 4.4×10 <sup>-3</sup>                                     | 8.3×10 <sup>-2</sup>                                       |
| 181             | 0.9                  | 7.0                                         | 0.0                   | 1.0                                                      | 7.8×10 <sup>-3</sup>                                     | 8.3×10 <sup>-2</sup>                                       |
| 190             | 0.7                  | 9.4                                         | 0.0                   | 1.5×10                                                   | 2.5×10 <sup>-2</sup>                                     | 8.3×10 <sup>-2</sup>                                       |
| 197             | 0.7                  | 7.0                                         | -0.1                  | 2.1×10                                                   | 3.1×10 <sup>-2</sup>                                     | 8.3×10 <sup>-2</sup>                                       |
| 203             | 0.7                  | 10.4                                        | 0.0                   | 3.7×10                                                   | 1.7×10 <sup>-3</sup>                                     | 8.8×10 <sup>-2</sup>                                       |
| 209             | 0.6                  | 7.4                                         | 0.0                   | 7.1                                                      | 5.4×10 <sup>-5</sup>                                     | 1.5×10 <sup>-1</sup>                                       |
| 215             | 0.9                  | 10.2                                        | 0.0                   | 7.5×10                                                   | 3.7×10 <sup>-3</sup>                                     | 5.1×10 <sup>-1</sup>                                       |

**Table S5: Snow properties of the upper snow subsurface layer (depth = 2–5 cm) at the study site, derived from snow pit observations and used in the albedo model. Snow properties of the lower snow subsurface layer (depth = 5–10 cm) are equivalent to the properties of the upper subsurface layer.**

| Day of the year | Snow grain size (mm) | Snow water equivalent (kg m <sup>-2</sup> ) | Snow temperature (°C) | Mass concentration of mineral dust (mg L <sup>-1</sup> ) | Mass concentration of black carbon (mg L <sup>-1</sup> ) | Mass concentration of organic carbon (mg L <sup>-1</sup> ) |
|-----------------|----------------------|---------------------------------------------|-----------------------|----------------------------------------------------------|----------------------------------------------------------|------------------------------------------------------------|
| 168             | 0.5                  | 11.4                                        | -0.1                  | 3.3×10 <sup>-1</sup>                                     | 2.3×10 <sup>-5</sup>                                     | 4.9×10 <sup>-2</sup>                                       |
| 176             | 0.8                  | 12.6                                        | -0.1                  | 3.3×10 <sup>-1</sup>                                     | 1.0×10 <sup>-4</sup>                                     | 4.9×10 <sup>-2</sup>                                       |
| 181             | 0.4                  | 13.6                                        | 0.0                   | 3.3×10 <sup>-1</sup>                                     | 1.0×10 <sup>-3</sup>                                     | 4.9×10 <sup>-2</sup>                                       |
| 190             | 0.7                  | 15.2                                        | 0.0                   | 6.4×10 <sup>-1</sup>                                     | 1.2×10 <sup>-5</sup>                                     | 4.9×10 <sup>-2</sup>                                       |
| 197             | 1.0                  | 15.6                                        | -0.1                  | 7.2                                                      | 3.5×10 <sup>-5</sup>                                     | 4.9×10 <sup>-2</sup>                                       |
| 203             | 0.8                  | 14.6                                        | 0.0                   | 2.5                                                      | 3.3×10 <sup>-3</sup>                                     | 5.2×10 <sup>-2</sup>                                       |
| 209             | 1.1                  | 13.8                                        | 0.0                   | 2.7×10                                                   | 5.6×10 <sup>-3</sup>                                     | 8.9×10 <sup>-2</sup>                                       |
| 215             | 1.1                  | 15.3                                        | 0.0                   | 1.4×10                                                   | 1.8×10 <sup>-2</sup>                                     | 3.0×10 <sup>-1</sup>                                       |

20
